# Supplementary material for: Technical note: GUARD – an automated fluid sampler preventing sample alteration by contamination, evaporation and gas exchange, suitable for remote areas and harsh conditions
Source: Copernicus journal article supplement (doi:10.5194/hess-22-4281-2018), 2018-08-13
Supplement: Supplementary file 1 [file hess-22-4281-2018-supplement.pdf]

Supplement of Hydrol. Earth Syst. Sci., 22, 4281–4293, 2018  
<https://doi.org/10.5194/hess-22-4281-2018-supplement>  
© Author(s) 2018. This work is distributed under  
the Creative Commons Attribution 4.0 License.

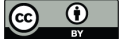

*Supplement of*

**Technical note: GUARD – an automated fluid sampler preventing sample alteration by contamination, evaporation and gas exchange, suitable for remote areas and harsh conditions**

**Arno Hartmann et al.**

*Correspondence to:* Arno Hartmann (arno.hartmann@kit.edu)

The copyright of individual parts of the supplement might differ from the CC BY 4.0 License.

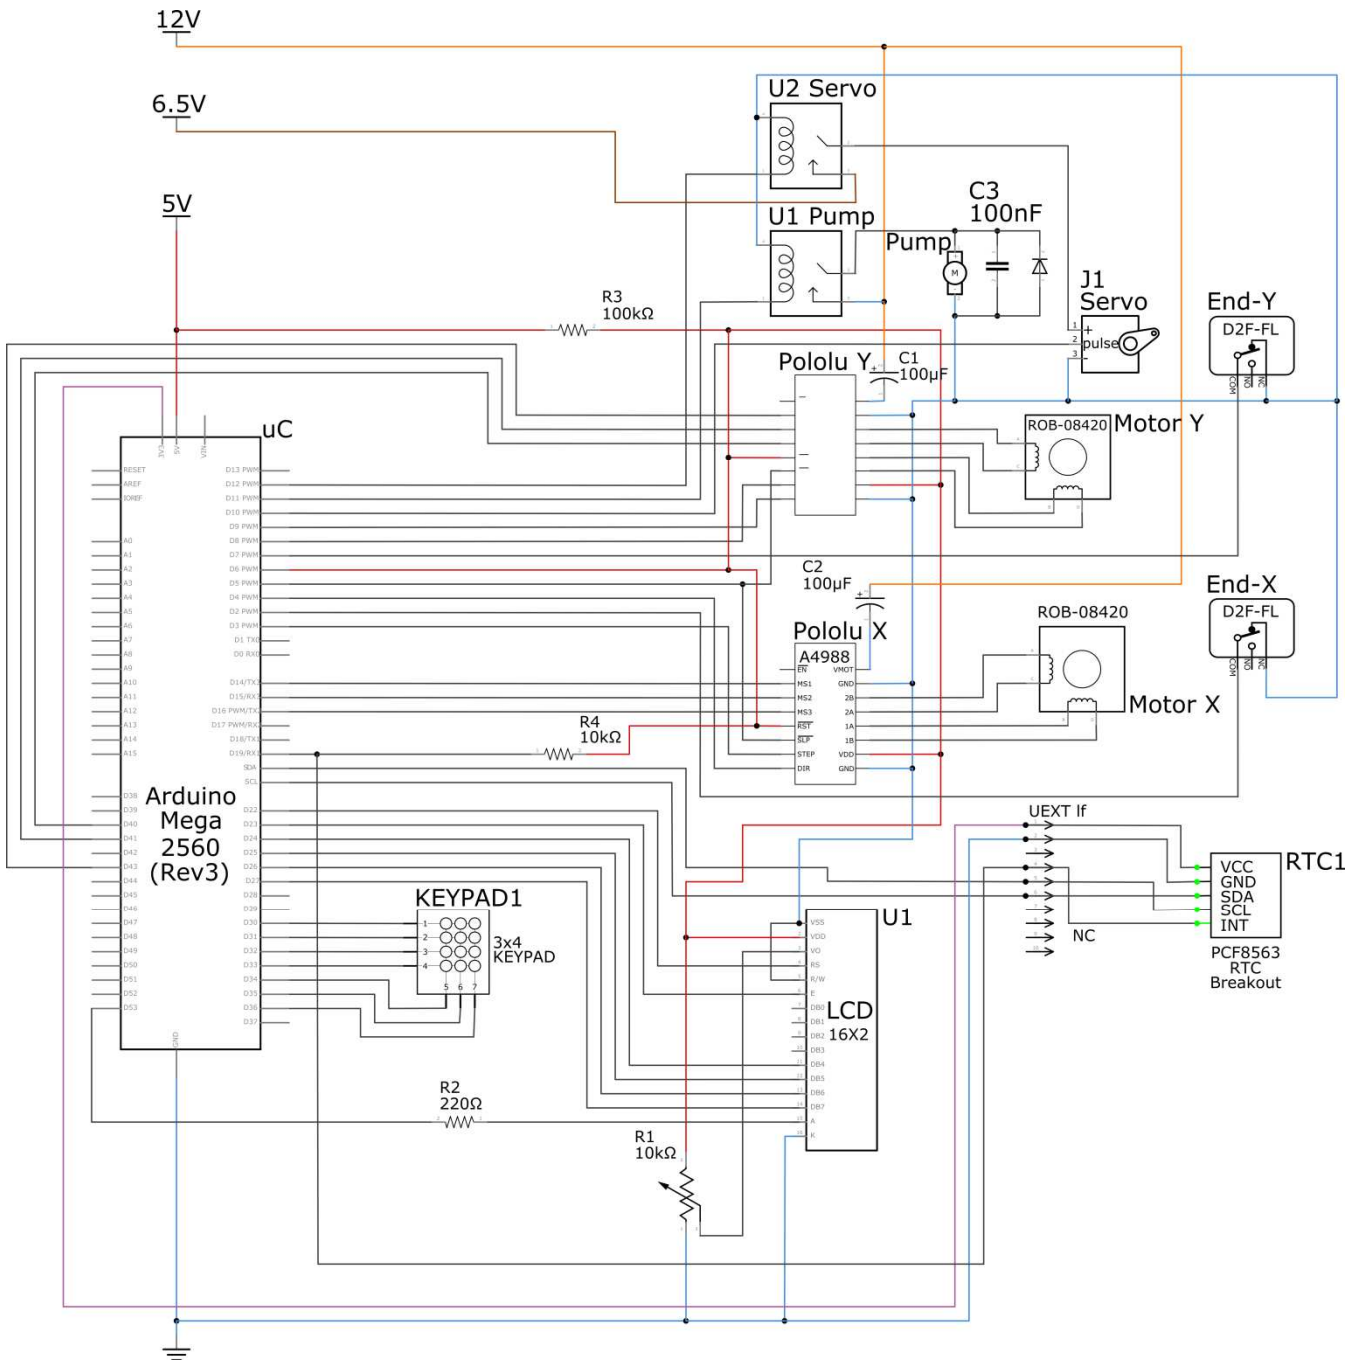

S1: Electrical circuit diagram of the GUARD autosampler.

The  $\delta D$  results (S2) also confirm the long-term stability of the samples: Again, if the vials were not airtight, evaporation would have led to a preferential removal of isotopically light water molecules from the water samples due to their higher vapour pressure (e.g. Hoefs, 2015) and, consequently, to an increase of the  $\delta D$  value of the remaining water sample over time. Such a positive trend is not present in the  $\delta D$  data and the results from the repeated measurements agree well with the initial ones. The difference in  $\delta D$  values between initial and repeated measurements ranges from  $-0.30\text{‰}$  (It20 and It23) to  $0.70\text{‰}$  (It02-05), but averages out at  $0.0\text{‰}$  over all measurements (median also  $0.0\text{‰}$ ) indicating that there is no systemic discrepancy between initial and repeated analyses (S2).

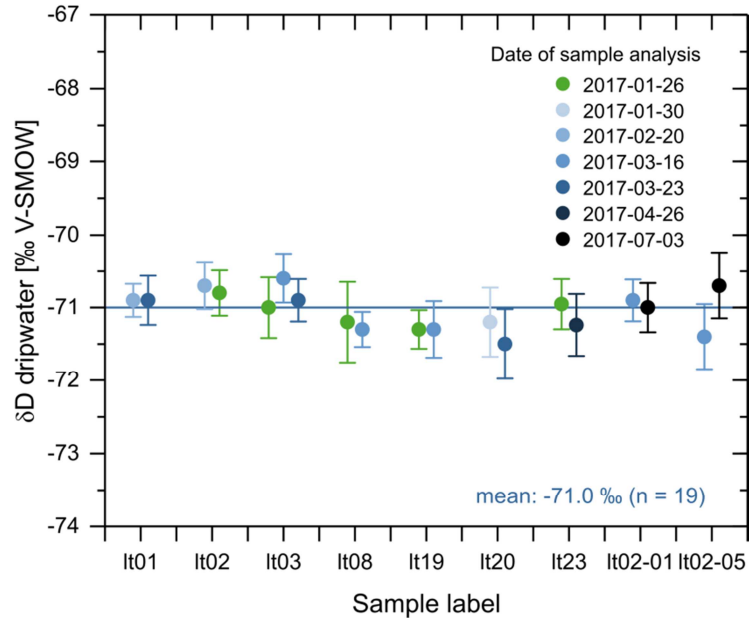

**S2: Results of repeated  $\delta D$  measurements (circles in tones of blue) measured in the automatically collected samples together with the original  $\delta D$  data from Fig. 5 (green circles) plotted against their respective label (“It” stands for Laichinger Tiefenhöhle). The darker the tones of blue, the later the respective measurement was repeated.**

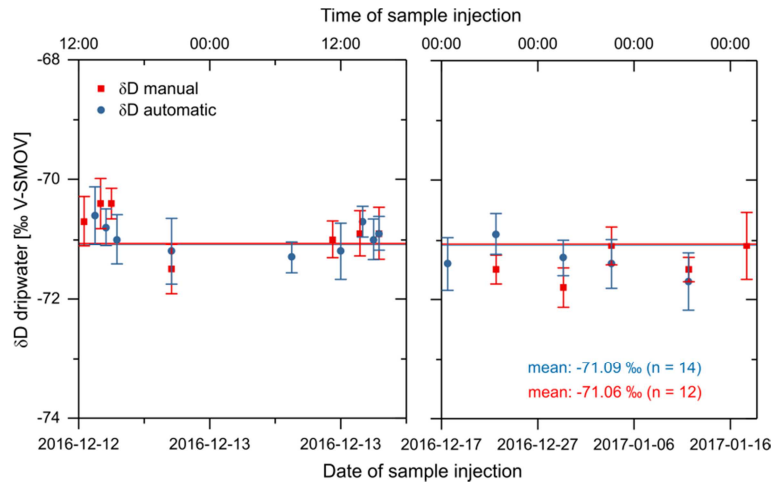

**S3: First field testing of the GUARD autosampler: Hydrogen isotope values (indicated as  $\delta D$  relative to the international standard V-SMOW) in dripwater samples from a specific drip site in the karst cave „Laichinger Tiefenhöhle“ in the Swabian Alb region, southern Germany. Samples were collected automatically (blue circles) over the course of 33 days (December 13, 2016, to January 14, 2017) and supplemented by 12 samples collected manually (red squares) for comparison of both methods. Error bars represent measurement uncertainty. Blue and red horizontal lines indicate the overall arithmetic mean of each data set. Note the difference in scale of the x-axes of the two sub-plots. Not all of the 33 samples were analysed for isotopic composition.**

To provide the readership with a notion of the effect of evaporation on the sample  $\delta^{18}O$  values, we have calculated both evaporation and  $\delta^{18}O$  change for the conditions prevalent in our fridge. Despite being set to 8 °C, the temperature in the fridge was measured to be 11.2 °C, relative humidity was 24 % according to measurements. Based on these conditions and assuming an opening of the sample vial of 5 % to imitate a minor lack of airtightness, evaporation was calculated using a formula that has proven adequate for inactive indoor swimming pools that are not influenced by direct sunlight or wind (Smith, Löf and Jones, 1994) using a water density of 1 g cm<sup>-3</sup>:

$$\frac{\dot{m}}{A} = \frac{(30.6 + 32.1 * v_w)(P_w - P_a)}{\Delta H_v}$$

where  $\dot{m}/A$  is the evaporation rate [kg (m<sup>2</sup> hr)<sup>-1</sup>],  $v_w$  is the air velocity over the water surface [m s<sup>-1</sup>],

$P_w$  is the saturation vapour pressure at the water temperature [mm Hg],  $P_a$  is the saturation vapour pressure at the air dew point [mm Hg] and  $\Delta H_v$  is the latent heat of water at the pool temperature [kJ kg].

The  $\delta^{18}O$  value of the residual water remaining at each given time was calculated on the basis of a fractionation factor  $\alpha$  between water and vapour according to the following formula (e.g. Clark and Fritz, 1999):

$$1000 \ln \alpha_{water-vapour} = 1.137(10^6/T_k^2) - 0.4156(10^3/T_k) - 2.0667$$

where  $T_k$  represents the temperature of the phase change [K] and on the following relationship (e.g. Hoefs, 2015):

$$\frac{R_w}{R_{w0}} = f^{(\frac{1}{\alpha}-1)}$$

where  $R_w$  is the isotope ratio of the water at a given time [‰ V-SMOW],  $R_{w0}$  is the initial isotope ratio of the water [‰ V-SMOW], and  $f$  is the fraction of the residual water [-]. The results of these calculations (S4) demonstrate that even a small slit in a sample vial's rubber septum equalling only 5 % of the vial's inner cross section leads to a substantial shift towards higher  $\delta^{18}\text{O}$  values in the residual water over time. After three months (90 days), for instance,  $\delta^{18}\text{O}$  values have risen from -10.1 ‰ by about 1.3 ‰ to -8.8 ‰. The difference between the lowest and the highest  $\delta^{18}\text{O}$  value in Fig. 6 of the manuscript is still below 0.3 ‰, while those data points span a longer period of six months. Most importantly, there is no positive trend in the  $\delta^{18}\text{O}$  values in Fig. 6 of the manuscript which illustrates the sample vials are sealed properly, even after sample injection.

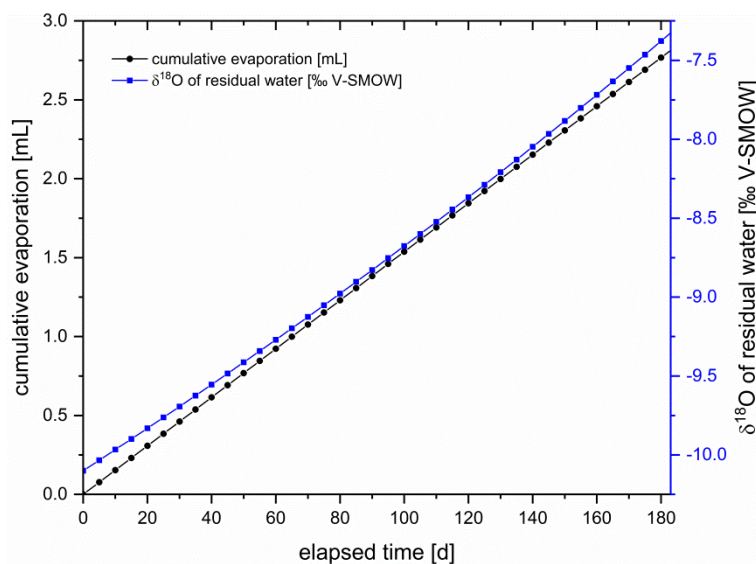

**S4: Effect of evaporation on the  $\delta^{18}\text{O}$  value of the residual water in a 12 mL sample vial at a temperature of 11.2 °C and a relative humidity of 24 %.**

**S5: Integral components of the GUARD autosampler of relevant size**

| <b>COMPONENTS</b>      | <b>Description</b>                                                                                                                                  | <b>Dimensions</b>       |
|------------------------|-----------------------------------------------------------------------------------------------------------------------------------------------------|-------------------------|
| <b>Mechanical</b>      |                                                                                                                                                     | Length x Width x Height |
| Z-movement: servo      | Reely® Standard RS-610 MG, operating voltage 6.6 V, attached to the Z-slide containing the double-cannula via an elongated hole in the servo's horn | 40x20x42 mm             |
| X-/Y- movement: motors | Sanyo Denki®, bipolar hybrid stepping motors, 1 A, 24 V, 1.8° step <sup>-1</sup> , 0.265Nm, 4 wires                                                 | 42x42x24 mm             |
| Pump                   | Peristaltic (flexible-tube) pump, model AP-40; operating voltage 12 V                                                                               | 55x50x42 mm             |

## S6: Bill of Materials

| Components                   | Description                                                                                                                                                                                                                                           | quantity | cost/unit | cost     | company           | order no.    |  |
|------------------------------|-------------------------------------------------------------------------------------------------------------------------------------------------------------------------------------------------------------------------------------------------------|----------|-----------|----------|-------------------|--------------|--|
| <b>Mechanical</b>            |                                                                                                                                                                                                                                                       |          |           |          |                   |              |  |
| Casing                       | Peli®, model 1610, heavy-duty, water-tight and airtight, including a valve for automatic pressure purge                                                                                                                                               | 1        | 252.35 €  | 252.35 € | Waterproof-Cases  | -            |  |
| Z-movement: servo            | Reely® Standard RS-610 MG, operating voltage 6.6 V, attached to the Z-slide containing the double-cannula via an elongated hole in the servo's horn                                                                                                   | 1        | 12.60 €   | 12.60 €  | Conrad Electronic | 1365925 - 05 |  |
| X-/Y- movement: motors       | Sanyo Denki®, bipolar hybrid stepping motors, 1 A, 24 V, 1.8°/step, 0.265Nm, 4 wires                                                                                                                                                                  | 2        | 38.95 €   | 77.90 €  | RS Components     | 829-3499     |  |
| Pump                         | Peristaltic (flexible-tube) pump, model AP-40; operating voltage 12 V,                                                                                                                                                                                | 1        | 19.90 €   | 19.90 €  | Gemke Technik     | APE40CD12V   |  |
| Sample vials                 | Labco Exetainer® 738W, soda glass, 12 mL, flat bottom, height (vial + cap) ≤ 101 mm; external ø ≤ 15.5 mm; internal ø ≥ 13.2 mm; including rubber septa with a thickness ≥ 3 mm; 48 vials of 300 in a packaging unit                                  | 1        | 22.28     | 22.28 €  | IVA               | IVA738W      |  |
| Tubing                       | Deutsch & Neumann®, FKM (synthetic rubber, "Viton"), Shore hardness 75, external ø ≤ 6.2 mm, internal ø 4 mm                                                                                                                                          | 3        | 12.90 €   | 38.70 €  | häberle Shop      | 9.205 765    |  |
| Double cannula               | Braun Sterican®, metal, external ø 0.60 mm; length excluding Luer-Lock connector 30 mm                                                                                                                                                                | 2        | 3.40 €    | 6.80 €   | häberle Shop      | 7.079 505    |  |
| Framework for slide movement | Makeblock XY Printer                                                                                                                                                                                                                                  | 1        | 269.95 €  | 269.95 € | Eckstein          | MB90014      |  |
| <b>Electronic</b>            |                                                                                                                                                                                                                                                       |          |           |          |                   |              |  |
| Battery                      | Panasonic®, valve regulated Pb-acid battery 12 V, 20 Ah, maintenance-free, non-spillable, low self-discharge, 5.8 kg, 76 x 167 x 181 mm; the sampler can also run on 12 V Li-ion batteries if weight is an important constraint                       | 1        | 75.03 €   | 75.03 €  | Voelkner          | S167901      |  |
| Microcontroller board        | Arduino® Mega 2560 including an Atmel ATmega 2560 microcontroller with 54 digital I/O pins, 16 analogue inputs, 6 interrupt inputs, 4 serial interfaces, 1 I <sup>2</sup> C interface and 4 KB EEPROM memory (non-volatile); hibernation mode-enabled | 1        | 21.99 €   | 21.99 €  | Conrad            | 1409778 - 05 |  |
| Real-time clock              | RTC PCF8563 powered by a separate 3V lithium button cell battery as a buffer battery                                                                                                                                                                  | 1        | 10.91 €   | 10.91 €  | Conrad            | 1195070 - 05 |  |
| Display                      | Liquid crystal display (LCD) with 2 lines à 16 characters                                                                                                                                                                                             | 1        | 9.87 €    | 9.87 €   | Conrad            | 183045 - 05  |  |
| <b>Other electronic</b>      | relay module                                                                                                                                                                                                                                          | 1        | 8.52 €    | 8.52 €   | Expotech          | EXP-R25-187  |  |
|                              | drivers for stepping motors                                                                                                                                                                                                                           | 2        | 7.95 €    | 15.90 €  | Expotech          | EXP-R25-001  |  |
|                              | casing for control panel                                                                                                                                                                                                                              | 1        | 5.28 €    | 5.28 €   | Conrad            | 522641-99    |  |
|                              | DC/ DC converter 12V                                                                                                                                                                                                                                  | 1        | 12.00 €   | 12.00 €  | Conrad            | 154170-05    |  |
|                              | DC/ DC converter 5V                                                                                                                                                                                                                                   | 1        | 2.65 €    | 2.65 €   | Conrad            | 157954-05    |  |
|                              | DC/ DC converter 6,5V                                                                                                                                                                                                                                 | 1        | 5.82 €    | 5.82 €   | Conrad            | 156674-05    |  |
|                              | CR2032 3V lithium button cell battery as a buffer battery                                                                                                                                                                                             | 1        | 2.26 €    | 2.26 €   | Conrad            | 1086225-05   |  |
|                              | USB service interface FrontCom® Micro IE-FCM-USB-A Weidmüller                                                                                                                                                                                         | 1        | 20.35 €   | 20.35 €  | Conrad            | 746885-05    |  |
|                              | Membrane keypad Matrix 1 x 12 SU709948                                                                                                                                                                                                                | 1        | 11.11 €   | 11.11 €  | Conrad            | 1341283-62   |  |
|                              | 3D print-outs (sample rack, connectors, double-canula adapter)                                                                                                                                                                                        | 1        | 15.00 €   | 15.00 €  | -                 | -            |  |
|                              | Aluminium slot profiles 20x20 mm Slot 5 (m)                                                                                                                                                                                                           | 1        | 2.94 €    | 2.94 €   | Motedis           | 19586        |  |
|                              | Sliding nuts Slot 5 100 pieces                                                                                                                                                                                                                        | 1        | 21.42 €   | 21.42 €  | Motedis           | 96214        |  |
|                              | Screw DIN 7984 M4x10 Slot 5                                                                                                                                                                                                                           | 100      | 0.12 €    | 12.00 €  | Motedis           | -            |  |
|                              | Bracket 20x40 I-type Slot 5 10 pieces                                                                                                                                                                                                                 | 3        | 7.50 €    | 22.50 €  | Motedis           | 093W202N05   |  |
|                              | Swivel Feet. Series 10 PA; foot 40, threaded rod 5x60 4 pieces                                                                                                                                                                                        | 4        | 1.00 €    | 4.00 €   | Motedis           | -            |  |
|                              | Miniature sliding rail IGUS drylin TK-04                                                                                                                                                                                                              | 1        | 10.16 €   | 10.16 €  | IGUS              | TS-04-07     |  |
|                              | CNC Aluminium Servo Horn 60mm for Futaba servos 25 teeth                                                                                                                                                                                              | 1        | 6.90 €    | 6.90 €   | Ebay              | 251439671553 |  |
|                              | Cable gland PG7 Polyamide black (RAL 9005) KSS EGRWW7 water-tight                                                                                                                                                                                     | 1        | 0.34 €    | 0.34 €   | Conrad            | 533738-05    |  |
|                              | zip ties different sizes 200 pieces                                                                                                                                                                                                                   | 1        | 3.80 €    | 3.80 €   | Conrad            | 541665-62    |  |
|                              | USB cable PC/Sampler                                                                                                                                                                                                                                  | 1        | 4.29 €    | 4.29 €   | Conrad            | 1592198-62   |  |
|                              | Merck® silicone grease for sealing 100gr.                                                                                                                                                                                                             | 1        | 68.70 €   | 68.70 €  | häberle Shop      | 1.07746.0100 |  |
|                              | Hose fitting, straight, 4040                                                                                                                                                                                                                          | 10       | 2.15 €    | 21.50 €  | häberle Shop      | 9.207 801    |  |
|                              | <b>Total</b>                                                                                                                                                                                                                                          |          |           |          | <b>1,095.72 €</b> |              |  |

The temporally discontinuous nature of rainfall poses a fundamental challenge to automatic rainwater sampling. In general, in order to prevent the pump from running dry and to avoid insufficient sample volumes during sample collection, rainwater needs to be pre-collected in a suitable container. In our case studies in karst caves we applied a specifically designed pre-collection container (“pre-collector”) with an internal volume of exactly 12 mL. During dripwater pre-collection a 3D-printed floating body (volume considered) inside the pre-collector would rise until it seals the pre-collector once it is completely filled with dripwater. Any dripwater in excess of 12 mL spills over through a small hole at the top of the pre-collector (S6).

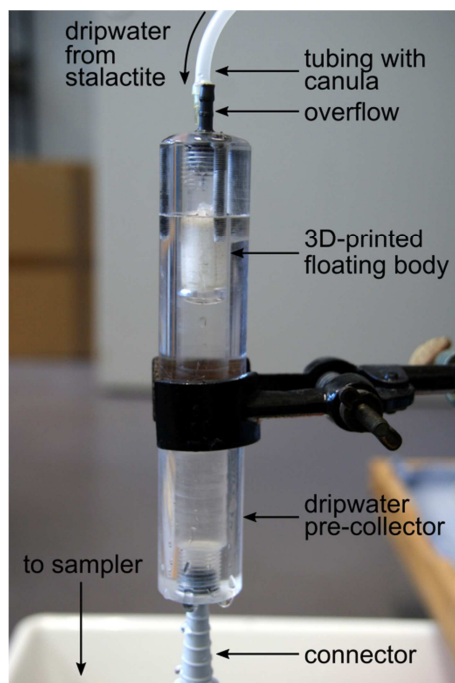

**S7: Pre-collector used during the case studies.**

## **References**

Clark, I. D.; Fritz, P.: Environmental isotopes in hydrogeology. [2. print., corr.]. Boca Raton: Lewis Publ. 1999.

Hoefs, J.: Stable isotope geochemistry. 7. ed. Cham: Springer (Earth Sciences). 2015.

Smith, C. C., Löf, G., Jones, R.: Measurement and analysis of evaporation from an inactive outdoor swimming pool. In: Pergamon 1994, pp. 3-7. 1994.
